# Supplementary material for: AAV-mediated in vivo knockdown of luciferase using combinatorial RNAi and U1i
Source: PubMed Central journal article supplement — Gene Ther. 2011 Apr 7;18(9):929–35. doi: 10.1038/gt.2011.41 (PMC3169806; doi:10.1038/gt.2011.41), 2011-04-07
Supplement: gt201141x1.pdf [file gt201141x1.pdf]

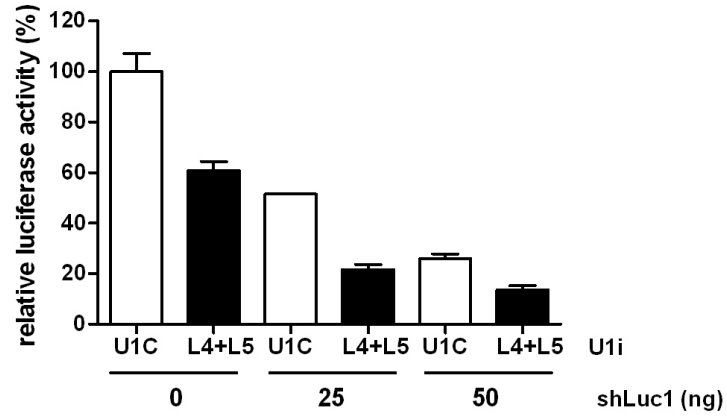

**Supplementary Figure 1.** Combination of shLuc1 with U1i increases luciferase knock-down *in vitro*. Co-transfection of increasing amounts (0, 25, 50 ng) shLuc1 construct with 200 ng (or 100 + 100 ng) U1i plasmid and firefly luciferase and renilla luciferase plasmid. Transfections and analysis were carried out as described in Figure 1a. Cells transfected with a combination of 0 ng shLuc1 and 200 ng U1C were set at 100%. Co-transfection of shLuc1 with U1i L4+L5 reduces luciferase activity compared to U1C with each shLuc1 dose tested. Data are presented as mean of three technical replicates +SD.
