# Supplementary material for: AAV-mediated in vivo knockdown of luciferase using combinatorial RNAi and U1i
Source: PubMed Central journal article supplement — Gene Ther. 2011 Apr 7;18(9):929–35. doi: 10.1038/gt.2011.41 (PMC3169806; doi:10.1038/gt.2011.41), 2011-04-07
Supplement: gt201141x2.pdf [file gt201141x2.pdf]

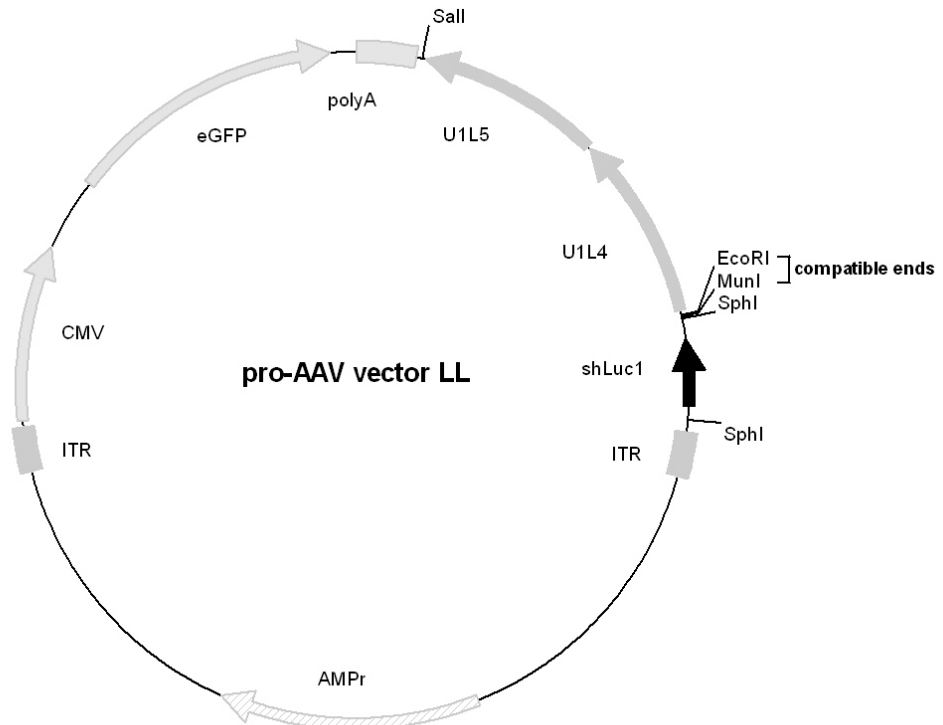

**Supplementary Figure 2.** Plasmid map of shRNA/U1i co-expression construct LL in a pro-AAV cloning vector. shLuc1 and U1i constructs L4 and L5 are each expressed from their own promoters, the H1 and the U1 snRNA promoter, respectively. The pro-AAV vector encodes the eGFP reporter gene under control of the CMV promoter, ITR sequences, and the ampicillin resistance gene (AMPr). Restriction sites used for cloning are depicted in the vector.
