# Supplementary material for: AAV-mediated in vivo knockdown of luciferase using combinatorial RNAi and U1i
Source: PubMed Central journal article supplement — Gene Ther. 2011 Apr 7;18(9):929–35. doi: 10.1038/gt.2011.41 (PMC3169806; doi:10.1038/gt.2011.41), 2011-04-07
Supplement: gt201141x3.pdf [file gt201141x3.pdf]

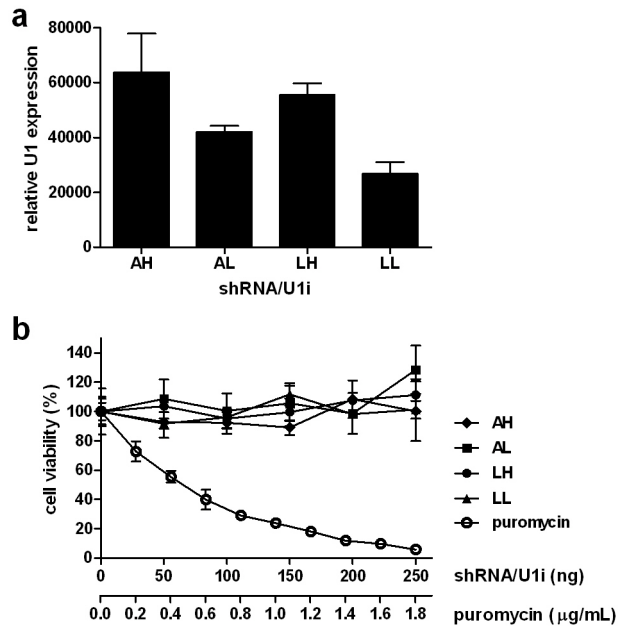

**Supplementary Figure 3.** (a) Recombinant U1 snRNA expression *in vitro*. One µg shRNA/U1i construct was transfected in 24-wells plates containing approximately  $2 \times 10^5$  HEK293T cells. Two days after transfection, RNA was isolated and qPCR was performed with U1- and actin-specific primers. Exogenous U1 snRNA expression was calculated relative to mock-transfected cells. AH expressed shApoB with double H1/H4, AL expressed shApoB with double L4/L5, LH expressed shLuc1 with double H1/H4, and LL expressed shLuc1 with double L4/L5. Data are presented as mean of three technical replicates +SD. (b) MTT cell viability assay after transfection with increasing amounts (50-250 ng) of shRNA/U1i constructs. Transfections were carried out as described in Figure 4. MTT assay was performed two days after transfection. Percentage cell viability is depicted relative to the control pro-AAV cloning vector. None of the shRNA/U1i constructs affected cell viability. Cell-death-inducing puromycin (0-1.8 µg/mL) was added to separate wells as a positive control to create a killing curve. Data are presented as mean of six technical replicates ±SD. Similar transfections were carried out in the murine C2C12 muscle cell line, and resulted in equal luciferase inhibition and normal cell viability compared with HEK293T-transfected cells (data not shown).
