# Supplementary material for: AAV-mediated in vivo knockdown of luciferase using combinatorial RNAi and U1i
Source: PubMed Central journal article supplement — Gene Ther. 2011 Apr 7;18(9):929–35. doi: 10.1038/gt.2011.41 (PMC3169806; doi:10.1038/gt.2011.41), 2011-04-07
Supplement: gt201141x4.pdf [file gt201141x4.pdf]

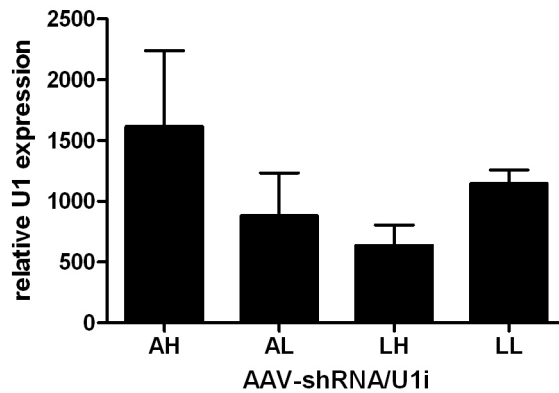

**Supplementary Figure 4.** Recombinant U1 snRNA expression *in vivo*. Mice were injected with AAV vectors as described in Figure 6. Eight weeks post-transduction, total RNA was isolated from four snap-frozen adductor muscles per AAV-shRNA/U1i construct and qPCR was performed with U1- and actin-specific primers. Exogenous U1 snRNA expression was calculated relative to PBS-injected control adductors. AAV-AH expressed shApoB with double H1/H4, AAV-AL expressed shApoB with double L4/L5, AAV-LH expressed shLuc1 with double H1/H4, and AAVLL expressed shLuc1 with double L4/L5. Data are presented as mean (n=4) +SE.
