# Supplementary material for: AAV-mediated in vivo knockdown of luciferase using combinatorial RNAi and U1i
Source: PubMed Central journal article supplement — Gene Ther. 2011 Apr 7;18(9):929–35. doi: 10.1038/gt.2011.41 (PMC3169806; doi:10.1038/gt.2011.41), 2011-04-07
Supplement: gt201141x5.pdf [file gt201141x5.pdf]

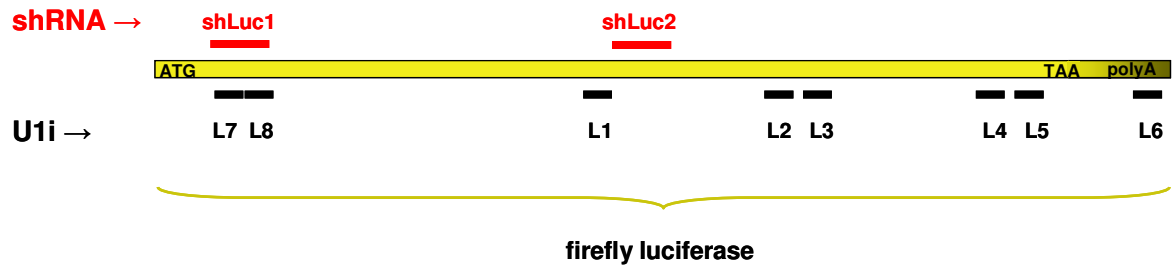

**Supplementary Figure 5.** Schematic representation of shRNA and U1i target sequences on the firefly luciferase gene. Depicted are the relative positions of shRNA shLuc1 and shLuc2 (red) and U1i L1-L8 (black) target sequences. Actual sequences are shown in Supplementary Table 2. ATG and TAA indicate luciferase start and stop codon, respectively. Figure not drawn to scale.
