# Supplementary material for: AAV-mediated in vivo knockdown of luciferase using combinatorial RNAi and U1i
Source: PubMed Central journal article supplement — Gene Ther. 2011 Apr 7;18(9):929–35. doi: 10.1038/gt.2011.41 (PMC3169806; doi:10.1038/gt.2011.41), 2011-04-07
Supplement: gt201141x6.pdf [file gt201141x6.pdf]

**Supplementary Table 1.** Luciferase knock-down after co-transfection of 100 ng U1i L4 or L5 plasmid together with 100 ng alternative U1i construct.

| <b>%</b>   | <b>L4</b>              | <b>L5</b>              |
|------------|------------------------|------------------------|
| <b>U1C</b> | <b>21</b>              | <b>34</b>              |
| <b>L1</b>  | <b>37</b>              | <b>51</b>              |
| <b>L2</b>  | <b>63</b>              | <b>68</b>              |
| <b>L3</b>  | <b>-31</b>             | <b>-42</b>             |
| <b>L4</b>  | nd                     | <b>84</b>              |
| <b>L5</b>  | <b>84</b>              | nd                     |
| <b>L6</b>  | <b>20<sup>ns</sup></b> | nd                     |
| <b>L7</b>  | <b>34</b>              | <b>36<sup>ns</sup></b> |
| <b>L8</b>  | <b>44</b>              | <b>33<sup>ns</sup></b> |

HEK293T cells transfected with 200 ng U1C were set at 100%. Experimental set-up as described in Figure 1a. Data are presented as mean of three technical replicates. Knock-down is significantly different from L4+U1C or L5+U1C ( $p < 0.001$ ), unless indicated 'ns' for 'non-significant'. nd = not determined.
