# Supplementary material for: AAV-mediated in vivo knockdown of luciferase using combinatorial RNAi and U1i
Source: PubMed Central journal article supplement — Gene Ther. 2011 Apr 7;18(9):929–35. doi: 10.1038/gt.2011.41 (PMC3169806; doi:10.1038/gt.2011.41), 2011-04-07
Supplement: gt201141x7.pdf [file gt201141x7.pdf]

**Supplementary Table 2. Oligonucleotides used in this study**

| name    | Sequence (5'-3')                                                                          | Target /Origin                                 |
|---------|-------------------------------------------------------------------------------------------|------------------------------------------------|
| shLuc1f | GATCCCC <b>GCCTTTACCGACGCACATAT</b> TTCCAAGAGA <b>ATATGTGCGTCGGTAAAGGC</b> TTTTTGCATGCC   | Luciferase (pGL4)<br>RNAxs <sup>1</sup>        |
| shLuc1r | TCGAGGCATGCAAAAAGCCTTTACCGACGCACATATTCTCTTGAAATATGTGCGTCGGTAAAGCGGG                       |                                                |
| shLuc2f | GATCCCC <b>CTGCCCTGCTGGTGGCCACAC</b> TTCCAAGAGAG <b>TGTGGCACCAGCAGGGCAG</b> TTTTTGCATGCC  | Luciferase (pGL4)<br>Adapted from <sup>2</sup> |
| shLuc2r | TCGAGGCATGCAAAAAGCTGCCCTGCTGGTGGCCACACTCTCTTGAAAGTGTGGCACCAGCAGGGCAGGGG                   |                                                |
| shGFPf  | GATCCCC <b>AGCTGGAGTACAAC</b> TACAACCTTCCCTGTCA <b>GTTGTAGTTGTACTCCAGCT</b> TTTTTGCATGCC  | eGFP                                           |
| shGFPf  | TCGAGGCATGCAAAAAGCTGGAGTACAACACTACAACGACAGGAAGGTTGTAGTTGTACTCCAGCTGGG                     |                                                |
| shApoBf | GATCCCC <b>GAGAGTTAATCTTTTCAGTAA</b> TTCCAAGAGAT <b>TATTGAAGAGATTAGCTCTC</b> TTTTTGCATGCC | hApoB <sup>3</sup>                             |
| shApoBr | TCGAGGCATGCAAAAAGAGAGCTAATCTCTTCAATAATCTCTTGAATTACTGAAAAGATTAACCTCTCGGG                   |                                                |
| U1L1f   | GATCTCAATAGTCTTGCGCAGGGGAGATACCAT                                                         | Luciferase (pGL4)                              |
| U1L1r   | GATCATGGTATCTCCCCTGC <b>GCAAGACTAT</b> TGA                                                |                                                |
| U1L2f   | GATCTCATGATCAGGCTGCAGGGGAGATACCAT                                                         | Luciferase (pGL4)                              |
| U1L2r   | GATCATGGTATCTCCCCTGC <b>AGCTGATCA</b> TGA                                                 |                                                |
| U1L3f   | GATCTCATGTTGCAGCAGCAGGGGAGATACCAT                                                         | Luciferase (pGL4)                              |
| U1L3r   | GATCATGGTATCTCCCCTGC <b>TGCTGCAACA</b> TGA                                                |                                                |
| U1L4f   | GATCTCAAGAATCTCGCGCAGGGGAGATACCAT                                                         | Luciferase (pGL4)                              |
| U1L4r   | GATCATGGTATCTCCCCTGC <b>GCGAGATTCT</b> TGA                                                |                                                |
| U1L5f   | GATCTCAATTACACGGCGCAGGGGAGATACCAT                                                         | Luciferase (pGL4)                              |
| U1L5r   | GATCATGGTATCTCCCCTGC <b>GCCGTGTAAT</b> TGA                                                |                                                |
| U1L6f   | GATCTCAAGTGGCACCTGCAGGGGAGATACCAT                                                         | Luciferase (pGL4)                              |
| U1L6r   | GATCATGGTATCTCCCCTGC <b>AGGTGCCACT</b> TGA                                                |                                                |
| U1L7f   | GATCTCACGGTAAAGGCGCAGGGGAGATACCAT                                                         | Luciferase (pGL4)                              |
| U1L7r   | GATCATGGTATCTCCCCTGC <b>GCCTTTACCG</b> TGA                                                |                                                |
| U1L8f   | GATCTCAATATGTGCGTGCAGGGGAGATACCAT                                                         | Luciferase (pGL4)                              |
| U1L8r   | GATCATGGTATCTCCCCTGC <b>ACGCACATAT</b> TGA                                                |                                                |
| U1H1f   | GATCTCACTGGAAGGCCGCAGGGGAGATACCAT                                                         | hHuntingtin                                    |
| U1H1r   | GATCATGGTATCTCCCCTGCGGCTTCCAGTGA                                                          |                                                |
| U1H4f   | GATCTCATTGCCTGGCCGCAGGGGAGATACCAT                                                         | hHuntingtin                                    |
| U1H4r   | GATCATGGTATCTCCCCTGCGGCCAGGCAATGA                                                         |                                                |
| U1Cf    | GATCTCATACTTACCTGGCAGGGGAGATACCAT                                                         | U1wt <sup>4</sup>                              |
| U1Cr    | GATCATGGTATCTCCCCTGCCAGGTAAGTATGA                                                         |                                                |
| pr59    | AATGGGCGGTAGGCGTGTA                                                                       | CMV qPCR                                       |
| pr60    | AGGCGATCTGACGTTCACTAA                                                                     |                                                |
| pr484   | CGAGTTTGGCACATTTGGCC                                                                      | U1 qPCR                                        |
| pr486   | GGGAGATACCATGATCACGAA                                                                     |                                                |
| pr480   | CAGCCATGTACGTTGCTATCCAGG                                                                  | hActin qPCR                                    |
| pr481   | AGGTCCAGACGCAGGATGGCATG                                                                   |                                                |
| pr530   | ACGGCCAGGTCATCACTATTG                                                                     | mActin qPCR                                    |
| pr531   | CAAGAAGGAAGGCTGAAAAGA                                                                     |                                                |

Luciferase, GFP, and ApoB sequences in the shRNA and U1i oligonucleotides are in bold

### Reference List

1. Tafer H, Ameres SL, Obernosterer G, Gebeshuber CA, Schroeder R, Martinez J *et al.* The impact of target site accessibility on the design of effective siRNAs. *Nat Biotechnol* 2008; **26**: 578-583.
2. Malik I, Garrido M, Bahr M, Kugler S, Michel U. Comparison of test systems for RNA interference. *Biochem Biophys Res Commun* 2006; **341**: 245-253.
3. Liao W and Ning G. Knockdown of apolipoprotein B, an atherogenic apolipoprotein, in HepG2 cells by lentivirus-mediated siRNA. *Biochem Biophys Res Commun* 2006; **344**: 478-483.
4. Fortes P, Cuevas Y, Guan F, Liu P, Pentlicky S, Jung SP *et al.* Inhibiting expression of specific genes in mammalian cells with 5'end-mutated U1 small nuclear RNAs targeted to terminal exons of pre-mRNA. *Proc Natl Acad Sci USA* 2003; **100**: 8264-8269.
